# Supplementary material
Source: HighWire-hosted journal article supplement (https://bmjopen.bmj.com/content/7/5/e015418)
Supplement: inline-supplementary-material-1 [file inline-supplementary-material-1.pdf]

| SECTION/TOPIC             | ITEM No. | CHECKLIST ITEM                                                                                                                                                                                                        |
|---------------------------|----------|-----------------------------------------------------------------------------------------------------------------------------------------------------------------------------------------------------------------------|
| <b>TITLE/ABSTRACT</b>     |          |                                                                                                                                                                                                                       |
| Title                     | 1a       | Identify in the title that the paper reports the development of a COS P1                                                                                                                                              |
| Abstract                  | 1b       | Provide a structured summary P2                                                                                                                                                                                       |
| <b>INTRODUCTION</b>       |          |                                                                                                                                                                                                                       |
| Background and Objectives | 2a       | Describe the background and explain the rationale for developing the COS. P4-5                                                                                                                                        |
|                           | 2b       | Describe the specific objectives with reference to developing a COS. P4-5                                                                                                                                             |
| Scope                     | 3a       | Describe the health condition(s) and population(s) covered by the COS. P5                                                                                                                                             |
|                           | 3b       | Describe the intervention(s) covered by the COS. P5                                                                                                                                                                   |
|                           | 3c       | Describe the setting(s) in which the COS is to be applied. P5                                                                                                                                                         |
| <b>METHODS</b>            |          |                                                                                                                                                                                                                       |
| Protocol/Registry Entry   | 4        | Indicate where the COS development protocol can be accessed, if available, and/or the study registration details. P5                                                                                                  |
| Participants              | 5        | Describe the rationale for stakeholder groups involved in the COS development process, eligibility criteria for participants from each group, and a description of how the individuals involved were identified. P6-7 |
| Information Sources       | 6a       | Describe the information sources used to identify an initial list of outcomes. P6                                                                                                                                     |
|                           | 6b       | Describe how outcomes were dropped/combined, with reasons (if applicable). P6-7                                                                                                                                       |
| Consensus Process         | 7        | Describe how the consensus process was undertaken. P7                                                                                                                                                                 |
| Outcome Scoring           | 8        | Describe how outcomes were scored and how scores were summarised. P7                                                                                                                                                  |
| Consensus Definition      | 9a       | Describe the consensus definition. P8                                                                                                                                                                                 |
|                           | 9b       | Describe the procedure for determining how outcomes were included or excluded from consideration during the consensus process. P14                                                                                    |
| Ethics and Consent        | 10       | Provide a statement regarding the ethics and consent issues for the study. P5                                                                                                                                         |
| <b>RESULTS</b>            |          |                                                                                                                                                                                                                       |
| Protocol Deviations       | 11       | Describe any changes from the protocol (if applicable), with reasons, and describe what impact these changes have on the results. N/A                                                                                 |
| Participants              | 12       | Present data on the number and relevant characteristics of the people involved at all stages of COS development. P6-8, 10, 12-13                                                                                      |
| Outcomes                  | 13a      | List all outcomes considered at the start of the consensus process. P14                                                                                                                                               |
|                           | 13b      | Describe any new outcomes introduced and any outcomes dropped, with reasons, during the consensus process. P14                                                                                                        |
| COS                       | 14       | List the outcomes in the final COS. P14                                                                                                                                                                               |
| <b>DISCUSSION</b>         |          |                                                                                                                                                                                                                       |
| Limitations               | 15       | Discuss any limitations in the COS development process. P15-16                                                                                                                                                        |
| Conclusions               | 16       | Provide an interpretation of the final COS in the context of other evidence, and implications for future research. P15-16                                                                                             |
| <b>OTHER INFORMATION</b>  |          |                                                                                                                                                                                                                       |
| Funding                   | 17       | Describe sources of funding/role of funders. P17                                                                                                                                                                      |
| Conflicts of Interest     | 18       | Describe any conflicts of interest within the study team and how these were managed. P17                                                                                                                              |
